# Supplementary material for: Slow but Steady—The Responsiveness of Sympathoadrenal System to a Hypoglycemic Challenge in Ketogenic Diet-Fed Rats
Source: Nutrients. 2021 Jul 29;13(8):2627. doi: 10.3390/nu13082627 (PMC8398867; doi:10.3390/nu13082627)
Supplement: Supplementary file 1 [file nutrients-13-02627-s001.zip › nutrients-1308870-supplementary.pdf]

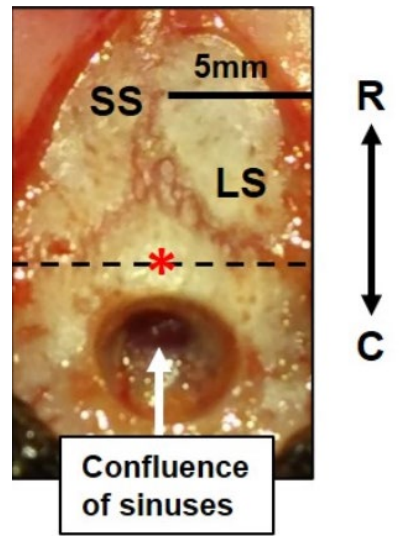

**Supplementary Figure S1.** Representative image showing a rat dorsal skull craniotomy exposing the confluence of sinuses. C – caudal, R – rostral, LS – lambdoid suture, SS – sagittal suture, dashed line – interaural line, red asterisk – Lambda.

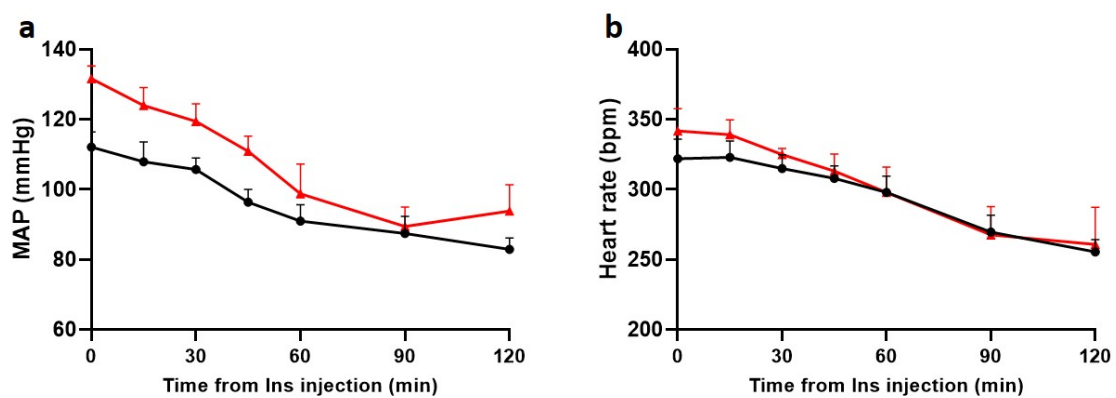

**Supplementary Figure S2.** The effects of insulin-induced hypoglycemia on blood pressure and heart rate in anesthetized rats. (a), Mean arterial pressure (MAP) and (b), Heart rate progressively decreased during the 2-h recording period in all groups; CHOW+Ins – black line, KD+Ins – red line. Data are mean + SEM

**Supplementary Table S1.** Grouped data for animals excluded due to clonic convulsions.

| Time post<br>Ins<br>injection   | 0min (n=4) | 15min (n=4) | 30min (n=4) | 45min (n=4)  | 60min (n=4) | 90min (n=4) | 120min<br>(n=2) |                   |                   |
|---------------------------------|------------|-------------|-------------|--------------|-------------|-------------|-----------------|-------------------|-------------------|
| ASNA (%Δ<br>from base-<br>line) | 0          | 23.1 ± 14.4 | 60.8 ± 18.2 | 106.8 ± 30.5 | 90.3 ± 26.7 | 68.2 ± 38.2 | -2.1 ± 4.4      | Convulsions (n=2) | Convulsions (n=2) |
| Blood glu-<br>cose<br>(mmol/L)  | 6.2 ± 0.7  | 4.7 ± 0.5   | 3.6 ± 0.4   | 2.9 ± 0.4    | 2.4 ± 0.3   | 1.8 ± 0.2   | 1.7 ± 0.6       |                   |                   |
| Blood BHB<br>(mmol/L)           | 1.6 ± 0.2  | 1.4 ± 0.4   | 0.8 ± 0.1   | 0.8 ± 0.2    | 0.7 ± 0.1   | 0.5 ± 0.1   | 0.7 ± 0.2       |                   |                   |

Values are mean ± SEM, number of animals are in parentheses.
